# Supplementary material
Source: PubMed Central journal article supplement (PMC3534800)
Supplement: NIHMS415489-supplement-01.pdf [file NIHMS415489-supplement-01.pdf]

Supplemental Figure 1.  
Dapp et. al.

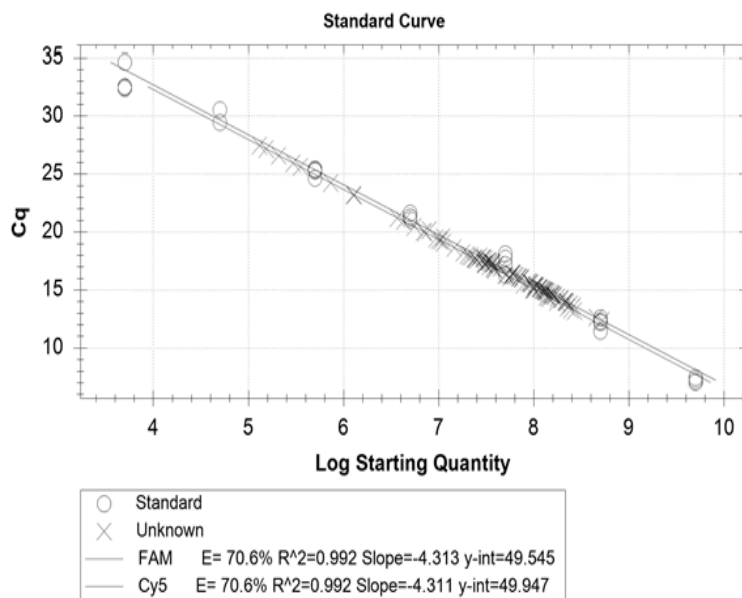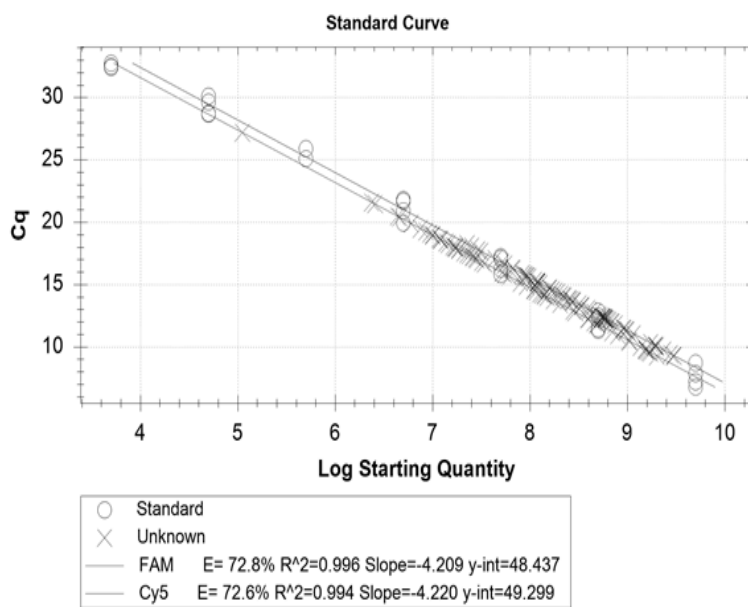

## Supplemental Table 2.

### Dapp et. al.

| Average relative mutant frequency |                      |       |                |            |              |              |         |
|-----------------------------------|----------------------|-------|----------------|------------|--------------|--------------|---------|
| RT variant                        | Number of replicates | Mean  | Std. Deviation | Std. Error | Lower 95% CI | Upper 95% CI | P-value |
| wild type                         | 8                    | 1.000 | N/A            | N/A        | N/A          | N/A          | N/A     |
| A62V                              | 8                    | 1.334 | 0.0711         | 0.0214     | 1.195        | 1.489        | *       |
| K65R                              | 8                    | 0.658 | 0.0863         | 0.0273     | 0.571        | 0.759        | ***     |
| L74V                              | 8                    | 0.928 | 0.0416         | 0.0132     | 0.866        | 0.994        | n/s     |
| Y115F                             | 8                    | 1.205 | 0.0592         | 0.0171     | 1.105        | 1.313        | *       |
| Y115A                             | 4                    | 4.203 | 0.1775         | 0.0888     | 2.193        | 8.056        | ***     |
| V148I                             | 4                    | 0.510 | 0.2782         | 0.1391     | 0.184        | 0.707        | ***     |
| M184I                             | 8                    | 0.605 | 0.0862         | 0.0305     | 0.513        | 0.714        | ***     |
| M184V                             | 8                    | 0.749 | 0.0790         | 0.0279     | 0.644        | 0.872        | *       |
| K65R/M184V                        | 5                    | 0.685 | 0.0805         | 0.0360     | 0.544        | 0.863        | **      |
| L74V/Y115F/M184V                  | 8                    | 0.780 | 0.0941         | 0.0284     | 0.682        | 0.893        | *       |

N/A is not applicable; n/s is not significant. \* P value < 0.05; \*\* P value < 0.01; \*\*\* P value < 0.001

Supplemental Table 3.  
Dapp et. al.

Fitness difference ( $W_D$ ) relative to reference strain

|                  | Replicate number |        |        |       |       |       | Mean  | STD   | Dunnett's Multiple Comparison Test |                 |         |
|------------------|------------------|--------|--------|-------|-------|-------|-------|-------|------------------------------------|-----------------|---------|
|                  | 1                | 2      | 3      | 4     | 5     | 6     |       |       | Mean diff.                         | 95% CI of diff. | P-value |
| wild type        | 0.888            | 0.918  | 1.220  | 1.070 | 0.956 | 0.904 | 0.993 | 0.129 | N/A                                | N/A             | N/A     |
| A62V             | 0.202            | 0.442  | 1.052  |       |       |       | 0.565 | 0.438 | 0.427                              | -0.077 to 0.504 | n/s     |
| K65R             | 0.036            | 0.614  | 0.058  |       |       |       | 0.236 | 0.327 | 0.757                              | 0.088 to 0.669  | **      |
| L74V             | 0.874            | 0.502  | 1.628  |       |       |       | 1.001 | 0.574 | 0.009                              | -0.295 to 0.286 | n/s     |
| Y115F            | 0.448            | 1.142  | 0.860  |       |       |       | 0.817 | 0.349 | 0.176                              | -0.203 to 0.369 | n/s     |
| Y115A            | 0.0045           | 0.0013 | 0.0023 |       |       |       | 0.003 | 0.002 | 0.990                              | 0.204 to 0.786  | ***     |
| V148I            | 0.051            | 0.068  | 0.015  |       |       |       | 0.045 | 0.027 | 0.948                              | 0.183 to 0.765  | ***     |
| M184I            | 0.242            | 0.033  | 0.033  |       |       |       | 0.103 | 0.121 | 0.890                              | 0.154 to 0.736  | **      |
| M184V            | 0.692            | 0.504  | 0.904  |       |       |       | 0.700 | 0.200 | 0.293                              | -0.144 to 0.437 | n/s     |
| K65R/M184V       | 0.085            | 0.614  | 0.342  |       |       |       | 0.347 | 0.265 | 0.646                              | 0.032 to 0.614  | *       |
| L74V/Y115F/M184V | 1.132            | 0.758  | 1.262  |       |       |       | 1.051 | 0.262 | 0.058                              | -0.320 to 0.262 | n/s     |

N/A is not applicable; n/s is not significant. \* P value < 0.05; \*\* P value < 0.01; \*\*\* P value < 0.001

**Table S1. Summary of fitness, processivity, and fidelity measures for HIV-1 RT variants used in this study.**

| RT variant       | Location          | Resistance Phenotype         | Effect on Fitness | Assay                            | Effect on Processivity          | Effect on Fidelity              | Assay                           | Citation            |    |
|------------------|-------------------|------------------------------|-------------------|----------------------------------|---------------------------------|---------------------------------|---------------------------------|---------------------|----|
| A62V             | Finger subdomain  | Q151M complex                | No Change         | Parallel growth                  |                                 |                                 |                                 | 1                   |    |
| K65R             | Finger subdomain  | ABC, ddI, ddC, 3TC, FTC, TDF | ↓ (29-fold)       | Dual competition                 |                                 |                                 |                                 | 1                   |    |
|                  |                   |                              | ↓ (40%)           | Single-cycle RC                  |                                 |                                 | 2                               |                     |    |
|                  |                   |                              | No Change         | Parallel growth                  |                                 |                                 | 3                               |                     |    |
|                  |                   |                              | ↓ (47%)           | Single-cycle RC                  | ↓ (31%)                         |                                 |                                 | 4                   |    |
|                  |                   |                              |                   |                                  |                                 |                                 |                                 | 5                   |    |
|                  |                   |                              |                   |                                  |                                 | ↑ (8.1-fold)                    | <i>In vitro</i> FMA             |                     | 6  |
|                  |                   |                              | ↓ (80%)           | Single-cycle RC: patient samples |                                 |                                 |                                 |                     | 7  |
|                  |                   |                              | ↓ (15%)           | Dual competition                 |                                 |                                 |                                 |                     | 8  |
|                  |                   |                              |                   |                                  |                                 | ↑ (3.3-fold)                    | <i>In vivo</i> single-cycle FMA |                     | 9  |
| L74V             | Finger subdomain  | ABC, ddI                     | ↓ (11%)           | Parallel growth                  |                                 |                                 |                                 | 10                  |    |
|                  |                   |                              | ↓                 | Parallel growth                  | ↓                               |                                 |                                 | 10                  |    |
|                  |                   |                              | ↓ (2-fold)        | Dual competition                 |                                 |                                 |                                 | 11                  |    |
|                  |                   |                              | No Change         | Parallel growth                  | ↓                               |                                 |                                 | 3                   |    |
|                  |                   |                              |                   |                                  |                                 |                                 |                                 | 5                   |    |
|                  |                   |                              |                   |                                  |                                 | ↑ (1.7-fold)                    | <i>In vitro</i> FMA             |                     | 6  |
|                  |                   |                              |                   |                                  |                                 | ↑ (2-6-fold)                    | Gel-based assay                 |                     | 12 |
|                  |                   |                              |                   |                                  |                                 | ↑ (3.5-fold)                    | <i>In vitro</i> FMA             |                     | 13 |
|                  |                   |                              |                   |                                  |                                 | No Change                       | <i>In vivo</i> single-cycle FMA |                     | 9  |
|                  |                   |                              |                   |                                  | No Change                       | Parallel growth                 |                                 |                     | 1  |
| Y115F            | dNTP binding site | ABC                          |                   |                                  | No change                       |                                 |                                 | 14                  |    |
|                  |                   |                              |                   |                                  | No Change                       | <i>In vitro</i> FMA             | 15                              |                     |    |
|                  |                   |                              |                   |                                  | No Change                       | <i>In vivo</i> single-cycle FSA | 16                              |                     |    |
| Y115A            | dNTP binding site | N/A                          |                   |                                  | ↓                               |                                 |                                 | 14                  |    |
|                  |                   |                              |                   |                                  |                                 |                                 |                                 | 15                  |    |
|                  |                   |                              | ↓ (100%)          | Parallel growth                  |                                 |                                 |                                 | 17                  |    |
|                  |                   |                              |                   |                                  | ↓ (4.0-fold)                    | <i>In vitro</i> FMA             |                                 | 13                  |    |
|                  |                   |                              |                   |                                  | ↓ (2.3-fold)                    | <i>In vivo</i> single-cycle FMA |                                 | 9                   |    |
| V148I            | Finger subdomain  | N/A                          |                   |                                  |                                 | ↑ (8.1-fold)                    | <i>In vitro</i> FMA             | 18                  |    |
|                  |                   |                              |                   |                                  |                                 | ↑ (8.7-fold)                    | <i>In vitro</i> FMA             | 19                  |    |
|                  |                   |                              |                   |                                  |                                 | ↑ (3.33-fold)                   | <i>In vivo</i> single-cycle FMA | 19                  |    |
| M184I            | dNTP binding site | ABC, 3TC, FTC                | ↓ (vs M184V)      | Parallel growth                  | ↓ (83%-49%)                     |                                 |                                 | 20                  |    |
|                  |                   |                              | ↓ (11.6-21.9%)    | <i>In vivo</i> reversion         |                                 |                                 |                                 | 21                  |    |
|                  |                   |                              | ↓ (10-fold)       | Dual competition                 |                                 |                                 |                                 | 22                  |    |
|                  |                   |                              | ↓ (5-fold)        | Single-cycle RC                  |                                 |                                 |                                 | 23                  |    |
|                  |                   |                              | No Change         | Single-cycle RC                  |                                 |                                 |                                 | 24                  |    |
|                  |                   |                              | ↓ (30%)           | Single-cycle RC                  | ↓                               |                                 |                                 | 25                  |    |
|                  |                   |                              |                   |                                  |                                 |                                 |                                 | 26                  |    |
|                  |                   |                              | ↓ (0-99.5%)       | Single-cycle RC                  |                                 | ↑ (4-fold)                      | <i>In vitro</i> FMA             |                     | 27 |
|                  |                   |                              |                   |                                  |                                 |                                 |                                 | 28                  |    |
| M184V            | dNTP binding site | ABC, 3TC, FTC                | ↓                 | Parallel growth                  | ↓ (75%-33%)                     |                                 |                                 | 20                  |    |
|                  |                   |                              | ↓ (11.6-21.9%)    | <i>In vivo</i> reversion         |                                 |                                 |                                 | 21                  |    |
|                  |                   |                              | ↓ (14-fold)       | Dual competition                 |                                 |                                 |                                 | 11                  |    |
|                  |                   |                              | ↓ (4-fold)        | Single-cycle RC                  |                                 |                                 |                                 | 23                  |    |
|                  |                   |                              | ↓ (35%)           | Single-cycle RC                  | ↓                               |                                 |                                 | 2                   |    |
|                  |                   |                              |                   |                                  |                                 |                                 |                                 | 5                   |    |
|                  |                   |                              | No Change         | Single-cycle RC                  |                                 |                                 |                                 | 24                  |    |
|                  |                   |                              | ↓ (4-8%)          | <i>In vivo</i> reversion         | ↓                               |                                 |                                 | 29                  |    |
|                  |                   |                              |                   |                                  |                                 |                                 | ↑ (1.2 fold)                    | <i>In vitro</i> FMA | 13 |
|                  |                   |                              |                   |                                  |                                 | ↓                               |                                 |                     | 26 |
|                  |                   |                              |                   |                                  |                                 |                                 | ↑ (1.6-fold)                    | <i>In vitro</i> FMA | 27 |
|                  |                   |                              |                   |                                  |                                 |                                 | ↑ (1.6-fold)                    | <i>In vitro</i> FMA | 30 |
| ↓ (3-6.2 fold)   | Parallel growth   |                              |                   |                                  |                                 | 31                              |                                 |                     |    |
|                  |                   |                              |                   | ↑ (1.3-fold)                     | <i>In vivo</i> single-cycle FMA | 32                              |                                 |                     |    |
| K65R/M184V       |                   | ABC, 3TC, FTC                | ↓ (65%)           | Single-cycle RC                  |                                 |                                 |                                 | 2                   |    |
|                  |                   |                              | ↓ (76%)           | Single-cycle RC                  | ↓ (69%)                         |                                 |                                 | 4                   |    |
| L74V/Y115F/M184V |                   | ABC                          |                   |                                  |                                 | ↓ (1.91-fold)                   | <i>In vivo</i> single-cycle FSA | 16                  |    |

Q151M multidrug resistance complex consists of A62V/V75I/F77L/F116Y/Q151M. ABC = Abacavir; ddI = Didanosine; ddC = Zalcitabine; FTC = Emtricitabine; 3TC = Lamivudine; TDF = Tenofovir. N/A means not applicable. Parallel growth describes fitness assay that replicated wt and mutant HIV-1 clones in separate cultures. Dual competition describes fitness assay that replicated wt and mutant HIV-1 clones together in co-culturing conditions. Single-cycle RC, replicative capacity, describes assay that compares transduction efficiency of wt and mutant HIV-1 vectors after one round of replication. *In vivo* reversion describes a fitness measure that

takes into account the reversion time of a particular mutant back to wt after therapy is withdrawn. *In vitro* FMA describes a cell-free forward mutation assay. Gel-based assay describes a cell-free assay that compares the ability of wt and mutant RTs to insert and extend mispairs on a specified template. *In vivo* single-cycle FMA is a cell-based forward mutation assay. *In vivo* single-cycle FSA is a cell-based frame shift detection assay.

## References

1. Maeda, Y., Venzon, D. J. & Mitsuya, H. (1998). Altered drug sensitivity, fitness, and evolution of human immunodeficiency virus type 1 with pol gene mutations conferring multi-dideoxynucleoside resistance. *J Infect Dis* **177**, 1207-13.
2. Deval, J., White, K. L., Miller, M. D., Parkin, N. T., Courcambeck, J., Halfon, P., Selmi, B., Boretto, J. & Canard, B. (2004). Mechanistic basis for reduced viral and enzymatic fitness of HIV-1 reverse transcriptase containing both K65R and M184V mutations. *The Journal of biological chemistry* **279**, 509-16.
3. Deval, J., Navarro, J. M., Selmi, B., Courcambeck, J., Boretto, J., Halfon, P., Garrido-Urbani, S., Sire, J. & Canard, B. (2004). A loss of viral replicative capacity correlates with altered DNA polymerization kinetics by the human immunodeficiency virus reverse transcriptase bearing the K65R and L74V dideoxynucleoside resistance substitutions. *The Journal of biological chemistry* **279**, 25489-96.
4. White, K. L., Margot, N. A., Wrin, T., Petropoulos, C. J., Miller, M. D. & Naeger, L. K. (2002). Molecular mechanisms of resistance to human immunodeficiency virus type 1 with reverse transcriptase mutations K65R and K65R+M184V and their effects on enzyme function and viral replication capacity. *Antimicrobial agents and chemotherapy* **46**, 3437-46.
5. Sharma, P. L., Nettles, J. H., Feldman, A., Rapp, K. & Schinazi, R. F. (2009). Comparative analysis of in vitro processivity of HIV-1 reverse transcriptases containing mutations 65R, 74V, 184V and 65R+74V. *Antiviral research* **83**, 317-23.
6. Shah, F. S., Curr, K. A., Hamburgh, M. E., Parniak, M., Mitsuya, H., Arnez, J. G. & Prasad, V. R. (2000). Differential Influence of Nucleoside Analog-resistance Mutations K65R and L74V on the Overall Mutation Rate and Error Specificity of Human Immunodeficiency Virus Type 1 Reverse Transcriptase. *J. Biol. Chem.* **275**, 27037-27044.
7. Weber, J., Chakraborty, B., Weberova, J., Miller, M. D. & Quinones-Mateu, M. E. (2005). Diminished replicative fitness of primary human immunodeficiency virus type 1 isolates harboring the K65R mutation. *Journal of Clinical Microbiology* **43**, 1395-400.
8. Svarovskaia, E. S., Feng, J. Y., Margot, N. A., Myrick, F., Goodman, D., Ly, J. K., White, K. L., Kutty, N., Wang, R., Borroto-Esoda, K. & Miller, M. D. (2008). The A62V and S68G mutations in HIV-1 reverse transcriptase partially restore the replication defect associated with the K65R mutation. *Journal of acquired immune deficiency syndromes* **48**, 428-36.
9. Mansky, L. M., Le Rouzic, E., Benichou, S. & Gajary, L. C. (2003). Influence of reverse transcriptase variants, drugs, and Vpr on human immunodeficiency virus type 1 mutant frequencies. *J Virol* **77**, 2071-2080.
10. Sharma, P. L. & Crumpacker, C. S. (1997). Attenuated replication of human immunodeficiency virus type 1 with a didanosine-selected reverse transcriptase mutation. *Journal of Virology* **71**, 8846-51.
11. Cong, M. E., Heneine, W. & Garcia-Lerma, J. G. (2007). The fitness cost of mutations associated with human immunodeficiency virus type 1 drug resistance is modulated by mutational interactions. *Journal of Virology* **81**, 3037-41.
12. Rubinek, T., Bakhanashvili, M., Taube, R., Avidan, O. & Hizi, A. (1997). The fidelity of 3' misinsertion and mispair extension during DNA synthesis exhibited by two drug-resistant mutants of the reverse transcriptase of human immunodeficiency virus type 1 with Leu74-->Val and Glu89-->Gly. *European journal of biochemistry / FEBS* **247**, 238-47.

13. Jonckheere, H., De Clercq, E. & Anne, J. (2000). Fidelity analysis of HIV-1 reverse transcriptase mutants with an altered amino-acid sequence at residues Leu74, Glu89, Tyr115, Tyr183 and Met184. *European journal of biochemistry / FEBS* **267**, 2658-65.
14. Martin-Hernandez, A. M., Domingo, E. & Menendez-Arias, L. (1996). Human immunodeficiency virus type 1 reverse transcriptase: role of Tyr115 in deoxynucleotide binding and misinsertion fidelity of DNA synthesis. *The EMBO journal* **15**, 4434-42.
15. Martin-Hernandez, A. M., Gutierrez-Rivas, M., Domingo, E. & Menendez-Arias, L. (1997). Mismatch extension fidelity of human immunodeficiency virus type 1 reverse transcriptases with amino acid substitutions affecting Tyr115. *Nucleic Acids Research* **25**, 1383-9.
16. Chen, R., Yokoyama, M., Sato, H., Reilly, C. & Mansky, L. M. (2005). Human immunodeficiency virus mutagenesis during antiviral therapy: impact of drug-resistant reverse transcriptase and nucleoside and nonnucleoside reverse transcriptase inhibitors on human immunodeficiency virus type 1 mutation frequencies. *J Virol* **79**, 12045-57.
17. Olivares, I., Sanchez-Merino, V., Martinez, M. A., Domingo, E., Lopez-Galindez, C. & Menendez-Arias, L. (1999). Second-site reversion of a human immunodeficiency virus type 1 reverse transcriptase mutant that restores enzyme function and replication capacity. *Journal of Virology* **73**, 6293-8.
18. Diamond, T. L., Souroullas, G., Weiss, K. K., Lee, K. Y., Bambara, R. A., Dewhurst, S. & Kim, B. (2003). Mechanistic understanding of an altered fidelity simian immunodeficiency virus reverse transcriptase mutation, V148I, identified in a pig-tailed macaque. *The Journal of biological chemistry* **278**, 29913-24.
19. Weiss, K. K., Chen, R., Skasko, M., Reynolds, H. M., Lee, K., Bambara, R. A., Mansky, L. M. & Kim, B. (2004). A role for dNTP binding of human immunodeficiency virus type 1 reverse transcriptase in viral mutagenesis. *Biochemistry* **43**, 4490-500.
20. Back, N. K., Nijhuis, M., Keulen, W., Boucher, C. A., Oude Essink, B. O., van Kuilenburg, A. B., van Gennip, A. H. & Berkhout, B. (1996). Reduced replication of 3TC-resistant HIV-1 variants in primary cells due to a processivity defect of the reverse transcriptase enzyme. *EMBO J.* **15**, 4040-4049.
21. Devereux, H. L., Emery, V. C., Johnson, M. A. & Loveday, C. (2001). Replicative fitness in vivo of HIV-1 variants with multiple drug resistance-associated mutations. *Journal of medical virology* **65**, 218-24.
22. Li, J., Li, L., Li, H. P., Zhuang, D. M., Liu, S. Y., Liu, Y. J., Bao, Z. Y., Wang, Z. & Li, J. Y. (2009). Competitive capacity of HIV-1 strains carrying M184I or Y181I drug-resistant mutations. *Chinese medical journal* **122**, 1081-6.
23. Hu, Z. & Kuritzkes, D. R. (2011). Interaction of reverse transcriptase (RT) mutations conferring resistance to lamivudine and etravirine: effects on fitness and RT activity of human immunodeficiency virus type 1. *Journal of Virology* **85**, 11309-14.
24. Julias, J. G., Boyer, P. L., McWilliams, M. J., Alvord, W. G. & Hughes, S. H. (2004). Mutations at position 184 of human immunodeficiency virus type-1 reverse transcriptase affect virus titer and viral DNA synthesis. *Virology* **322**, 13-21.
25. Van Cor-Hosmer, S. K., Daddacha, W. & Kim, B. (2010). Mechanistic interplay among the M184I HIV-1 reverse transcriptase mutant, the central polypurine tract, cellular dNTP concentrations and drug sensitivity. *Virology* **406**, 253-60.
26. Boyer, P. L. & Hughes, S. H. (1995). Analysis of mutations at position 184 in reverse transcriptase of human immunodeficiency virus type 1. *Antimicrobial agents and chemotherapy* **39**, 1624-8.
27. Rezende, L. F., Drosopoulos, W. C. & Prasad, V. R. (1998). The influence of 3TC resistance mutation M184I on the fidelity and error specificity of human immunodeficiency virus type 1 reverse transcriptase. *Nucleic Acids Research* **26**, 3066-72.
28. Jamburuthugoda, V. K., Santos-Velazquez, J. M., Skasko, M., Operario, D. J., Purohit, V., Chugh, P., Szymanski, E. A., Wedekind, J. E., Bambara, R. A. & Kim, B. (2008). Reduced

- dNTP binding affinity of 3TC-resistant M184I HIV-1 reverse transcriptase variants responsible for viral infection failure in macrophage. *The Journal of biological chemistry* **283**, 9206-16.
29. Paredes, R., Sagar, M., Marconi, V. C., Hoh, R., Martin, J. N., Parkin, N. T., Petropoulos, C. J., Deeks, S. G. & Kuritzkes, D. R. (2009). In vivo fitness cost of the M184V mutation in multidrug-resistant human immunodeficiency virus type 1 in the absence of lamivudine. *Journal of Virology* **83**, 2038-43.
  30. Drosopoulos, W. C. & Prasad, V. R. (1998). Increased misincorporation fidelity observed for nucleoside analog resistance mutations M184V and E89G in human immunodeficiency virus type 1 reverse transcriptase does not correlate with the overall error rate measured in vitro. *Journal of Virology* **72**, 4224-30.
  31. Aquaro, S., Svicher, V., Ceccherini-Silberstein, F., Cenci, A., Marcuccilli, F., Giannella, S., Marcon, L., Calio, R., Balzarini, J. & Perno, C. F. (2005). Limited development and progression of resistance of HIV-1 to the nucleoside analogue reverse transcriptase inhibitor lamivudine in human primary macrophages. *The Journal of antimicrobial chemotherapy* **55**, 872-8.
  32. Mansky, L. M. & Bernard, L. C. (2000). 3'-azido-3'-deoxythymidine (AZT) and AZT-resistant reverse transcriptase can increase the in vivo mutation rate of human immunodeficiency type 1. *J. Virol.* **74**, 9532-9539.
